# Supplementary material
Source: HighWire-hosted journal article supplement (https://www.annfammed.org/highwire/filestream/8171/field_highwire_adjunct_files/0/Odom-Walker_Supp_App.pdf)
Supplement: Odom-Walker_Supp_App.pdf [file Odom-Walker_Supp_App.pdf]

**Online Supplementary Material**

Odom Walker K, Clarke R, Ryan G, Brown AF. Effect of closure of a local safety-net hospital on primary care physicians' perceptions of their role in patient care. *Ann Fam Med*. 2011;9(6):496-503.

<http://www.annfammed.org/content/496/DC1>

**Supplemental Appendix 1. Questions From the Interview Guide Developed With the Community Advisory Board**

1. Think back to when you first started working in Los Angeles. How did you decide to work here?
2. What has continued to motivate you to work here?
3. What were the major reasons why you left the area?
4. If you didn't leave a previous position, why have your colleagues left underserved areas?
5. What would motivate you to leave your current position?
6. Has hospital closure in the safety net affected your practice? If yes, how?
7. Has hospital closure affected your admitting privileges, your access to specialty care, elective surgeries, teaching opportunities, emergent/urgent care, or anything else?
8. Has the closure of Martin Luther King (MLK) Hospital in the safety net affected your practice? If yes, how?
9. Has the closure of MLK affected your admitting privileges, your access to specialty care, elective surgeries, teaching opportunities, emergent/urgent care, or anything else?
10. What are barriers to working in your current clinical setting? (Prompts: Income? Support? IT? Clinic structure? Patient flow? Referral barriers?)
11. How can more physicians be recruited to work in South Los Angeles or similar underserved Los Angeles communities?
12. If you had a chance to give advice about recruiting more doctors to the area, what would you say?

IT = information technology.
